# Supplementary material
Source: publisher figshare collection journal article supplement (https://gsajournals.figshare.com/ndownloader/files/28505820)
Supplement: Supplementary file 1 [file 28505820]

**Supplemental Material for**

**Understanding population structure in an evolutionary context: population-specific *F*ST and pairwise *F*ST**

Shuichi Kitada*, Reiichiro Nakamichi†, and Hirohisa Kishino‡§

* Tokyo University of Marine Science and Technology, Tokyo 108-8477, Japan

† Fisheries Research and Education Agency, Yokohama 236-8648, Japan

‡ Graduate School of Agriculture and Life Sciences, The University of Tokyo, Tokyo 113-8657, Japan

§The Research Institute of Evolutionary Biology, Tokyo 138-0098, Japan

This PDF file includes two sets of supplemental materials.

1. Supplemental Figures S1–S10
2. Supplemental Note

Supplemental Tables 1-7 are provided in an Excel file.

The R codes for our representation method exemplified by the human data and simulations of population colonization used in this study are available in the Supplemental Material.

1. **Supplemental Figures S1–S10**

**Figure S1** Population colonization simulations of eight-directional grid colonization (Figure 1E). (Upper) 7,000 ancestral SNPs and 3,000 newly derived SNPs were selected. (Bottom) 9,000 ancestral SNPs and 1,000 newly derived SNPs were selected. (A, D) Population-specific *F*ST values. (B, E) Unrooted neighbor -joining (NJ) tree based on pairwise *F*ST overlaid with population-specific *F*ST values. (C, F) Multi-dimensional scaling (MDS) of pairwise *F*ST. The color of each population indicates the magnitude of population-specific *F*ST values between red (for the smallest *F*ST) and blue (for the largest *F*ST).

**Figure S2** Population-specific *F*ST values for 25 simulated populations are presented for each model in Figure 1 (A–E).

**Figure S3** Results from population colonization simulations. Schematic diagrams of the models: (A) one, (B) two, (C) three-directional colonization, (D) three-directional grid colonization from an edge, and (E) eight-directional grid colonization from the center. Population 1 in red is ancestral, and the yellow arrows indicate the direction of colonization. Lines show opportunities for migration. The effective population size of the ancestral population was 10 times greater () than that of the newly derived population () after one generation, and each population exchanged 1% of genes with adjacent population(s) in every generation, as indicated by the arrows (see the text). Neighbor-joining (NJ) unrooted trees (F–J) and multi-dimensional scaling (MDS) plots (K–O) based on the pairwise *F*ST distance matrix overlaid with population-specific *F*ST values for each model. The color of each population indicates the magnitude of population-specific *F*ST values between red (for the smallest *F*ST) and blue (for the largest *F*ST).

**Figure S4** Population structure of human populations. Sampling locations for 51 populations (upper). Data from Cann et al. (2002). Neighbor-joining (NJ) unrooted tree based on the pairwise *F*ST distance matrix (lower). Data from Rosenberg *et al.* (2002).

**Figure S5** Relationships between different population-specific *F*ST estimators for 51 human populations. (A) BB (Beaumont and Balding, 2004) vs. FG (Foll and Gaggiotti 2006) (. (B) WG (Weir and Goudet 2017) vs. BB (. Data from Rosenberg *et al.* (2002).

**Figure S6** Population structure of humans based on Bayesian (Beaumont and Balding, 2004) and moment population-specific *F*ST (Weir and Goudet 2017) estimators. Neighbor-joining (NJ) unrooted trees of the pairwise *F*ST distance matrix obtained from the Bayesian population-specific *F*ST estimator using (A) 51 samples and (B) 37 subsamples. (C) WG population-specificmoment *F*ST using 37 subsamples. The numbers of sampling locations of the subsamples were as follows: 3 from Africa, 6 from the Middle East/Europe, 9 from Central/South Asia, 18 from East Asia, 2 from Oceania, and 4 from America. The color of each population indicates the magnitude of population-specific *F*ST values between red (for the smallest *F*ST) and blue (for the largest *F*ST).

**Figure S7** Population structure of Atlantic cod populations. Sampling locations of 34 wild Atlantic cod populations (left). NJ unrooted tree based on the pairwise *F*ST distance matrix (right). Data from Therkildsen *et al.* (2013) and Hemmer-Hansen (2013).

**Figure S8** Population structure of wild poplar populations. Sampling locations of 25 wild poplar populations (upper). Neighbor-joining (NJ) unrooted tree based on the pairwise *F*ST distance matrix (lower). Data from McKown *et al.* (2014b).

**Figure** **S9** Map showing population connectivity with the magnitude of population-specific *F*ST values using a diverging color palette (see the text). (A) Human. (B) Atlantic cod. (C) Wild poplar. Populations connected by yellow lines are those with pairwise *F*ST < 0.02.

**Figure S10** *He* vs. Weir and Goudet’s population-specific *F*ST values.

Human:. Atlantic cod: . Wild poplar: .

**B. Supplemental Note**

1. *G*ST and Nei and Chesser’s *F*ST estimator
2. Weir and Goudet’s population-specific *F*ST estimator
3. *F*ST estimators used in this study

We summarized the *F*ST estimators used in our study for readers’ convenience, using notations consistent with those of Weir and Hill (2002): *i* for populations (), *u* for alleles (), and *l* for loci () (see original papers that developed the *F*ST estimators for detailed information).

1. ***G*ST and Nei and Chesser’s *F*ST estimator**

Nei (1973) proposed the *G*ST measure to explicitly formulate Wright’s *F*-statistics using genetic diversity while allowing multiple alleles. *G*ST is equal to *F*ST for diploid random mating populations (Excoffier 2007).

*G*ST is defined as the ratio of between-population heterozygosity to total heterozygosity; that is,
where is total heterozygosity and is within-population heterozygosity. Here, all populations are assumed in Hardy-Weinberg Equilibrium (Nei, 1973). At a single locus, (total heterozygosity) and (within-population heterozygosity) are

*F*ST is the ratio of between to total variance. The estimator is therefore a ratio estimator and consequently biased. To correct the bias, Nei and Chesser (1983) derived the unbiased moment estimators of and in diploid populations. This estimator (NC83) assumes that samples ( individuals) are randomly chosen from a set of fixed populations (). The gene diversities in population *i* are written based on the homozygote genotype frequency and allele frequency , which are given as

Because observed genotype frequencies are unbiased, is unbiasedly estimated by

where denotes observed homozygote genotype frequencies. To estimate , Nei and Chesser (1983) used the expectation of , because is biased, as

Those authors then calculated the expectation of observed gene diversity in population *i*: because ,

Using the method of moments, they obtained the unbiased estimator of gene diversity in population *i* :

Because observed genotype frequencies are unbiased, was unbiasedly estimated by

. Thus, they unintentionally derived population-specific gene diversity.

Under the assumption that all populations are in Hardy–Weinberg equilibrium, , we obtain

The expectation of the average of observed gene diversity over all populations was similarly derived as

where , and is the harmonic mean of , namely, . The unbiased moment estimator of gene diversity over all populations was derived as

Here, is the unbiased estimator of gene diversity () based on the homozygote genotype frequencies over all populations:

where . To obtain the unbiased estimator of , they derived the expectation of observed mean gene diversity over all populations:

where . From this equation, they obtained the unbiased moment estimator of as

Under the assumption that all populations are in Hardy–Weinberg equilibrium, . In this situation, the estimators are a function of allele frequencies only at a single locus:

1. **Weir and Goudet’s population-specific *F*ST estimator**

Weir and Goudet (2017) derived the bias-corrected moment estimator of population-specific (WG) for random mating populations, when only allele frequencies are used, as

is the unbiased within-population matching of two distinct alleles of population *i:*

where is the sample size (number of individuals) taken from population *i*, and is the observed frequency of allele *u*. We note that equals (Equation S1):

is the between-population-pair matching average over pairs of populations :

is the matching of one allele in individuals taken from each of populations :

1. ***F*ST estimators applied in this study**

To estimate genome-wide pairwise *F*ST, we used the NC83 bias-corrected *G*ST moment estimator (Nei and Chesser 1983) for overall loci () (genome-wide pairwise *F*ST):

In our analyses, we extended the WG population-specific *F*ST estimator (Weir and Goudet 2017) to overall loci (genome-wide population-specific *F*ST) (Buckleton *et al*. 2016):

These are called the “ratio of averages” *F*ST estimator (Weir and Cockerham 1984; Weir and Hill 2002; Bhatia et al.2013).

The variance–covariance matrix of the population-specific *F*ST estimator can be written as Using the Taylor series expansion for the first term, we inferred the asymptotic variance as

Similarly, the asymptotic covariances between population-specific *F*ST values of populations were obtained by

where the variance and covariance components were calculated by

, ,

,

We also applied empirical (Beaumont and Balding, 2004) and full Bayesian (Foll and Gaggiotti, 2006) population-specific *F*ST estimators. Beaumont and Balding (2004) maximized the Dirichlet-multinomial marginal likelihood in their Equation 1 and estimated :

Here, is the scale parameter of the Dirichlet prior distribution for locus *l* and population *i*, is the observed frequency of allele *u* () at locus *l*, is the observed allele count in population *i*, and is the total number of alleles. Importantly, is the mean allele frequency over all populations, whereas , where . The parametrization reduces the number of parameters to be estimated. Based on a Dirichlet (multi-allelic) and/or a beta (bi-allelic) scale parameter, population-specific *F*ST values were estimated for each locus using the following function of (Beaumont and Balding, 2004):
